# Supplementary material
Source: Elsevier journal article supplement (https://www.sciencedirect.com/science/article/pii/S0033833816301801)
Supplement: mmc1 [file S0033833816301801:mmc1.docx]

**GLOSARIO PET**

**Coincidencia:** es cuando la detección de dos fotones tiene lugar dentro de la ventana de temporal y ambos fotones están dentro de la ventana energética.

**Coincidencia verdadera:** es cuando los dos fotones detectados provienen de la misma aniquilación y no se han dispersado dentro del paciente.

**Coincidencia dispersada:** es cuando uno de los dos fotones de la aniquilación ha interaccionado antes de ser detectado y ha cambiado su dirección original.

**Coincidencia aleatoria:** es cuando los dos fotones detectados provienen de dos aniquilaciones distintas.

**Cristal centelleador:** es el material que se utiliza para detectar al par de fotones que se generan en la aniquilación. Cuando los fotones interaccionan en el cristal depositando su energía, se produce un pulso de luz proporcional a la energía depositada en un tiempo idealmente muy corto.

**Tubo fotomultiplicador:** es el fotodetector que se emplea convencionalmente para convertir la señal de luz generada en el cristal centelleador en pulso eléctrico para su posterior procesado.

**Resolución energética:** es un parámetro que caracteriza la capacidad de un detector para reproducir la energía de la partícula detectada. En un detector si todas las partículas depositan la misma energía, las lecturas de estos valores estarán repartidas según una distribución Gaussiana centrada en el valor de la energía depositada por las partículas. Cuando más estrecha sea dicha distribución, mejor será la resolución energética del detector.

**Ventana energética**: representa los valores mínimo y máximo de energía que ha de tener el fotón detectado en la coincidencia. El tamaño de esta ventana está en función de la resolución energética del detector. Idealmente los fotones de la aniquilación han de depositar toda su energía (511 keV) en el detector, pero no siempre ocurre. En algunos casos los fotones han interaccionado anteriormente, cambiando su dirección inicial y reduciendo su energía (fotones dispersados). Para reducir el número de fotones dispersados se utiliza la ventana energética.

**Ventana de coincidencia temporal:** es la condición temporal que deben de cumplir los dos fotones detectados para considerarlos una coincidencia. Los fotones de la aniquilación se emiten simultáneamente y, salvo la diferencia de camino recorridos, deben de detectarse casi en el mismo momento. Como la producción de la señal y el análisis de ésta por parte del sistema no es instantánea, hay diferencias temporales inevitables durante el proceso de detección de la coincidencia. Para tener en cuenta esto, se utiliza una ventana de coincidencia temporal, cuya anchura está en función de la resolución temporal.

**Resolución espacial:** es la capacidad que tiene el sistema de reproducir con fidelidad las variaciones en la distribución de actividad del radiofármaco en el objeto a examen. Se define como la mínima distancia a la que se encuentren dos puntos que permita distinguirlos.

**Función de dispersión de punto:** describe la respuesta de un sistema de imagen a una fuente puntual. Es una medida de la resolución espacial de dicho sistema.

**Anchura a mitad altura:** es un parámetro que se usa para caracterizar las distribuciones Gaussianas proporcionando su extensión y representa la anchura a media altura de la distribución. Está relacionado con la sigma de la distribución Gaussiana mediante la expresión FWHM≈2.35σ.

**Indeterminación angular:** es la variación en la dirección de los fotones de 511 keV debido al momento del positrón. Se espera que la emisión de los dos fotones de la aniquilación sea en la misma dirección pero en sentidos opuestos (antiparalelos) porque el momento del positrón cuando se aniquila es cero. Pero existe una variación en el momento del positrón que produce una variación en la emisión antiparalela y se dice que no son colineales.

**Profundidad de interacción:** es el lugar dentro del cristal centelleador donde se el fotón ha interaccionado. El fotón de 511 keV viaja una distancia desconocida dentro del cristal antes de interaccionar y esta distancia se conoce como la profundidad de interacción.

**Error de paralaje:** es el error que se produce cuando se desconoce la profundidad de interacción. Si el fotón entra muy oblicuo dentro del cristal puede ocurrir que la localización donde ha interaccionado y el punto de entrada en el cristal no sean el mismo, o incluso se entre por un cristal y se interaccione en otro. En estos casos se asignará una línea de respuesta incorrecta. El efecto del error de paralaje es el de empeorar la resolución espacial radialmente conforme nos alejamos del centro del campo de visión.

**Sensibilidad:** se define como el número de cuentas por unidad de tiempo detectadas por el dispositivo divididas por la actividad presente en la fuente. La sensibilidad depende de la eficiencia geométrica, la eficiencia de los detectores, las ventanas energéticas y temporales y el tiempo muerto del sistema.

**Colimación electrónica:** en PET expresa el hecho de por detectar los dos fotones emitidos antiparalelamente en coincidencia se conoce la dirección de la que provienen y no es necesario tener un colimador físico para conocer ésta. La colimación electrónica tiene dos ventajas fundamentales sobre la física: aumenta la sensibilidad del sistema y mejora la uniformidad de la función de dispersión de punto (relacionada con la resolución espacial del sistema).

**Septo:** se conoce como al material puesto entre los anillos detectores de un PET para que la detección fuera en dos dimensiones y se redujera el número de coincidencias dispersadas entre planos. Con el septo se divide la cámara en una serie de anillos detectores contiguos e independientes.

**Corrección de la atenuación:** la atenuación de la radiación es el efecto físico más importante en PET e implica una reducción en el número de coincidencias detectadas frente a las emitidas debido al objeto a examinar. Los pares fotones de 511 keV que se crean dentro del paciente, debido al efecto fotoeléctrico o a la dispersión Compton, pueden ser absorbidos dentro del paciente o escapar del sistema, por tanto, no detectarse la coincidencia. Este efecto produce imágenes de PET donde la actividad se sobreestima en zonas superficiales o áreas poco densas (pulmones) porque los fotones emitidos en estas regiones tienen menos probabilidad de interaccionar. Además se pierde el valor cuantitativo de la imagen de PET. Por tanto es necesario corregir la atenuación y en un sistema PET/TAC se utiliza el TAC para obtener el mapa de los coeficientes de atenuación lineal del objeto a estudiar.

**Tiempo de vuelo:** implica que para cada suceso de aniquilación (emisión de dos fotones de 511 keV) se registra el tiempo en que cada fotón de la coincidencia ha llegado de manera muy precisa y se calcula la diferencia de estos tiempos. Ya que el fotón que ha recorrido menos trayectoria (estaba más cerca) llegará antes (pues ambos fotones viajan a la misma velocidad), la diferencia de tiempos nos ayudará a situar dónde ha tenido lugar la aniquilación a lo largo de la línea de respuesta del detector.
